# Supplementary material for: A study of the DIBAL-promoted selective debenzylation of α-cyclodextrin protected with two different benzyl groups
Source: publisher site journal article supplement (doi:10.3762/bjoc.18.165), 2022-11-17

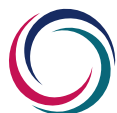

## Supporting Information

for

### **A study of the DIBAL-promoted selective debenylation of $\alpha$ -cyclodextrin protected with two different benzyl groups**

Naser-Abdul Yousefi, Morten L. Zimmermann and Mikael Bols

*Beilstein J. Org. Chem.* **2022**, *18*, 1553–1559. [doi:10.3762/bjoc.18.165](https://doi.org/10.3762/bjoc.18.165)

### **Copies of NMR spectra of compounds 7–10**

## Table of contents

|                                             |    |
|---------------------------------------------|----|
| 1. Copies of NMR spectra of <b>7</b> .....  | S2 |
| 2. Copies of NMR spectra of <b>8</b> .....  | S3 |
| 3. Copies of NMR spectra of <b>9</b> .....  | S6 |
| 4. Copies of NMR spectra of <b>10</b> ..... | S9 |

$^1\text{H}$  NMR (500 MHz,  $\text{CDCl}_3$ ) of **7**

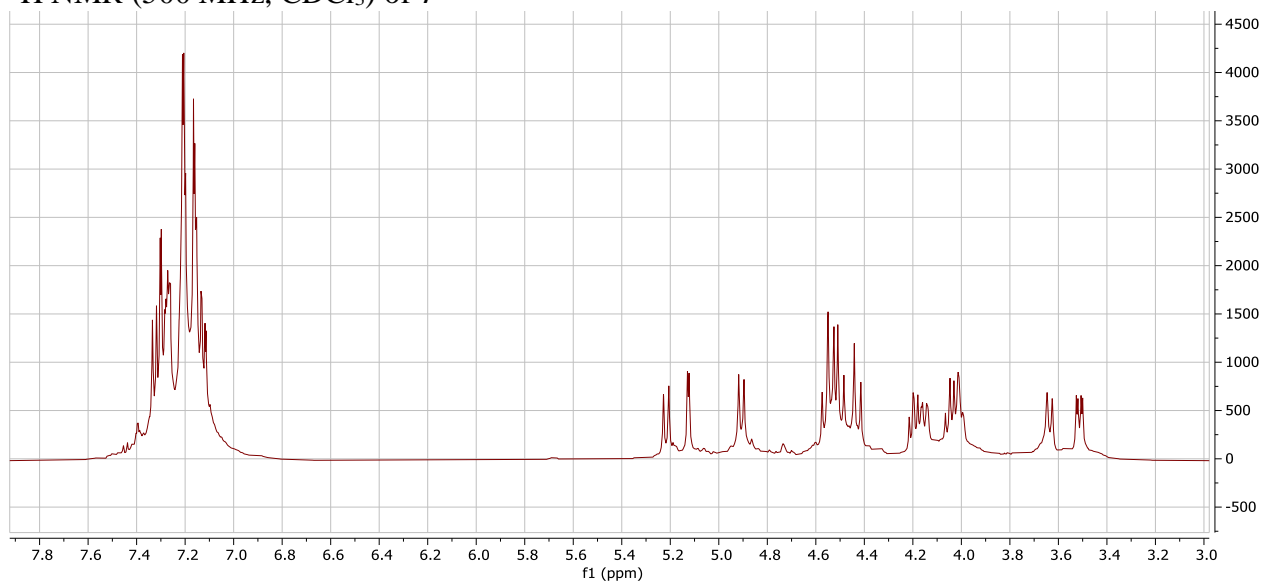

$^{13}\text{C}$  NMR (126 MHz,  $\text{CDCl}_3$ ) of **7**

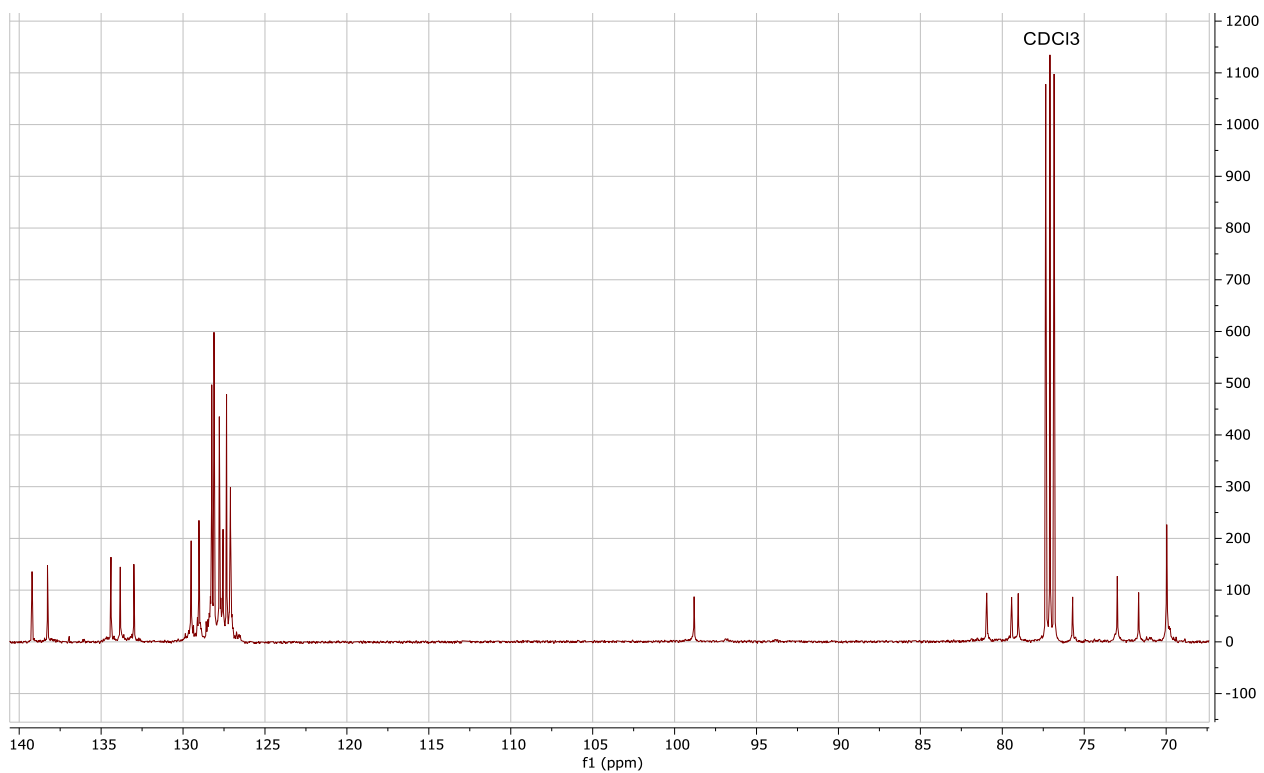

$^1\text{H}$  NMR (800 MHz,  $\text{CDCl}_3$ ) of **8**

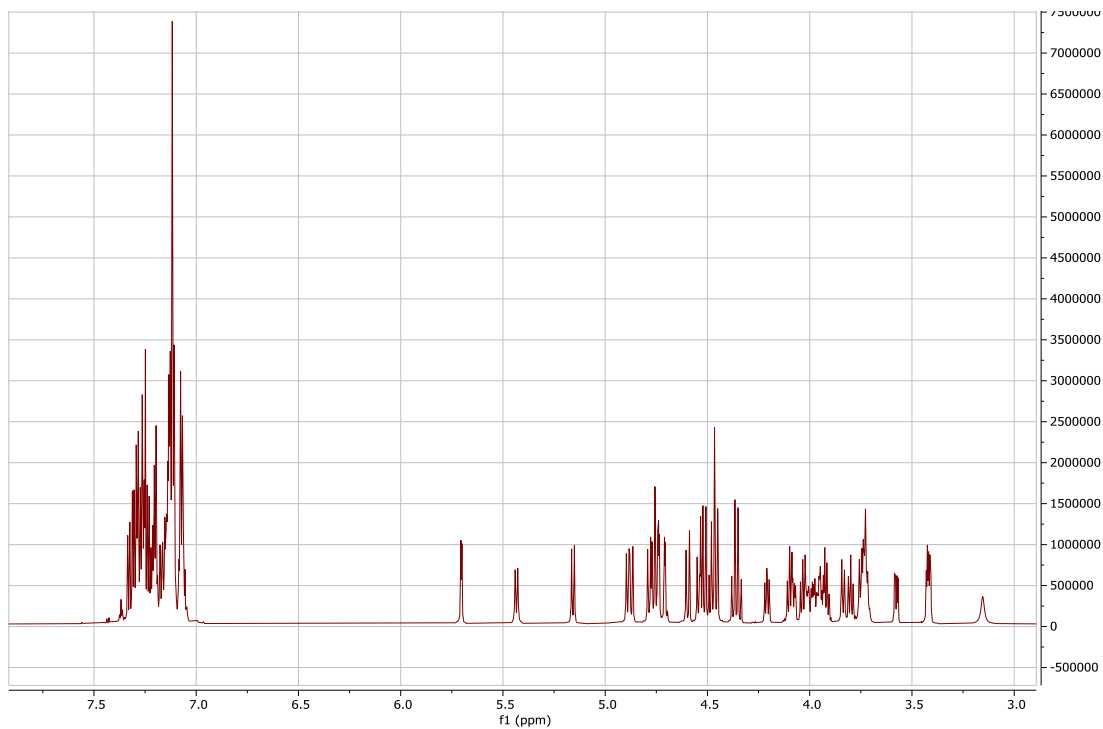

$^{13}\text{C}$  NMR (200 MHz,  $\text{CDCl}_3$ ) of **8**

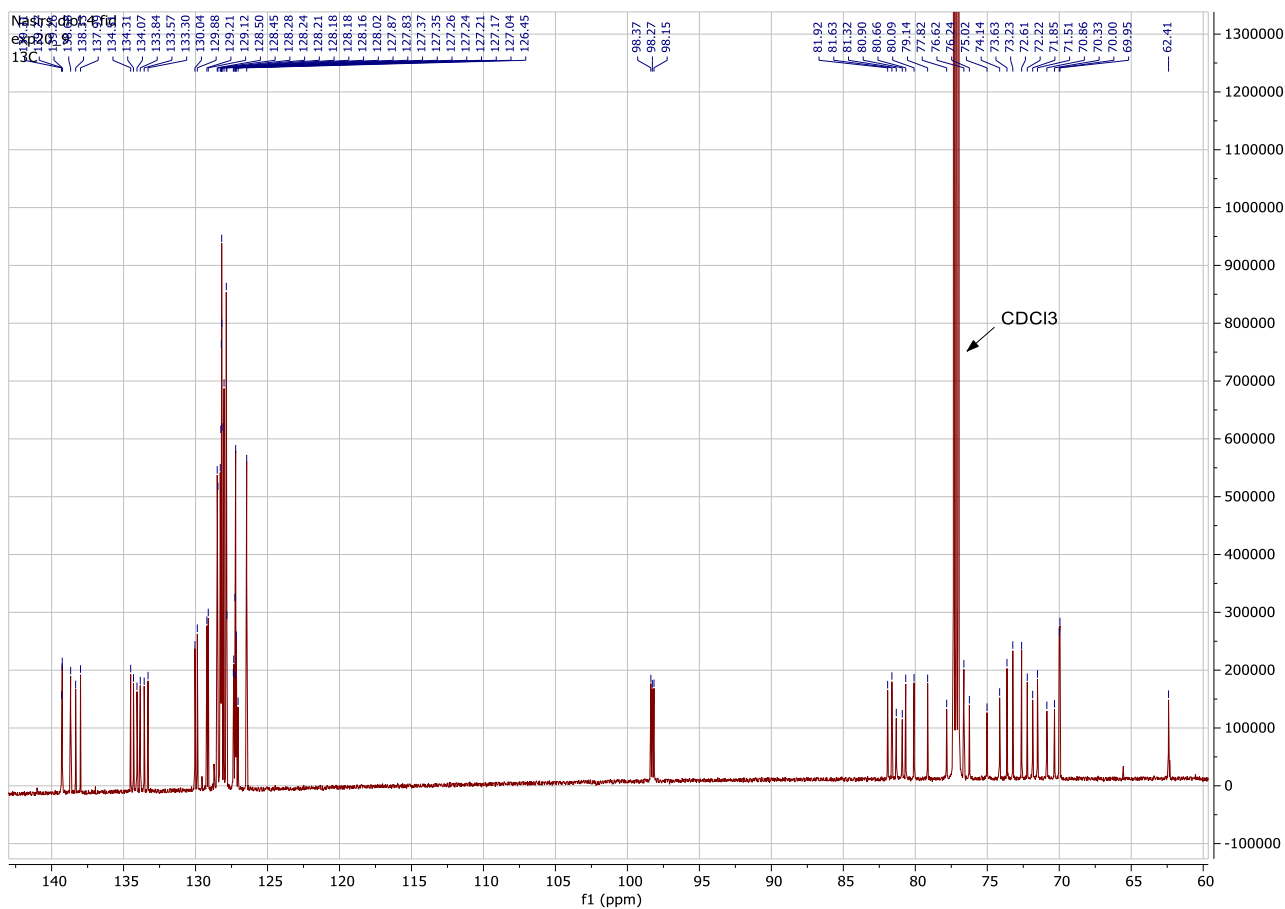

COSY (800 MHz, CDCl<sub>3</sub>) of **8** ( $\delta$  2.5–6.0; aromatic signals not included)

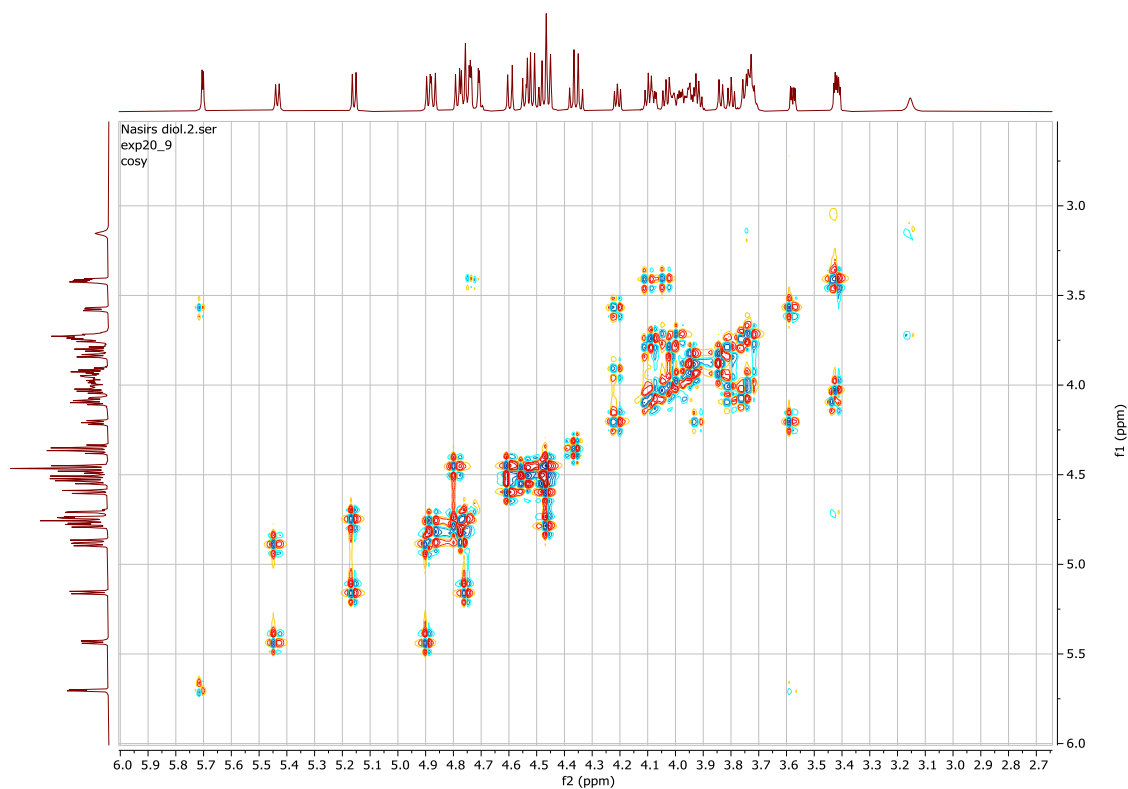

HSQC (CDCl<sub>3</sub>) of **8** (aromatic signals not shown, anomeric signal folded in, offset -80 ppm)

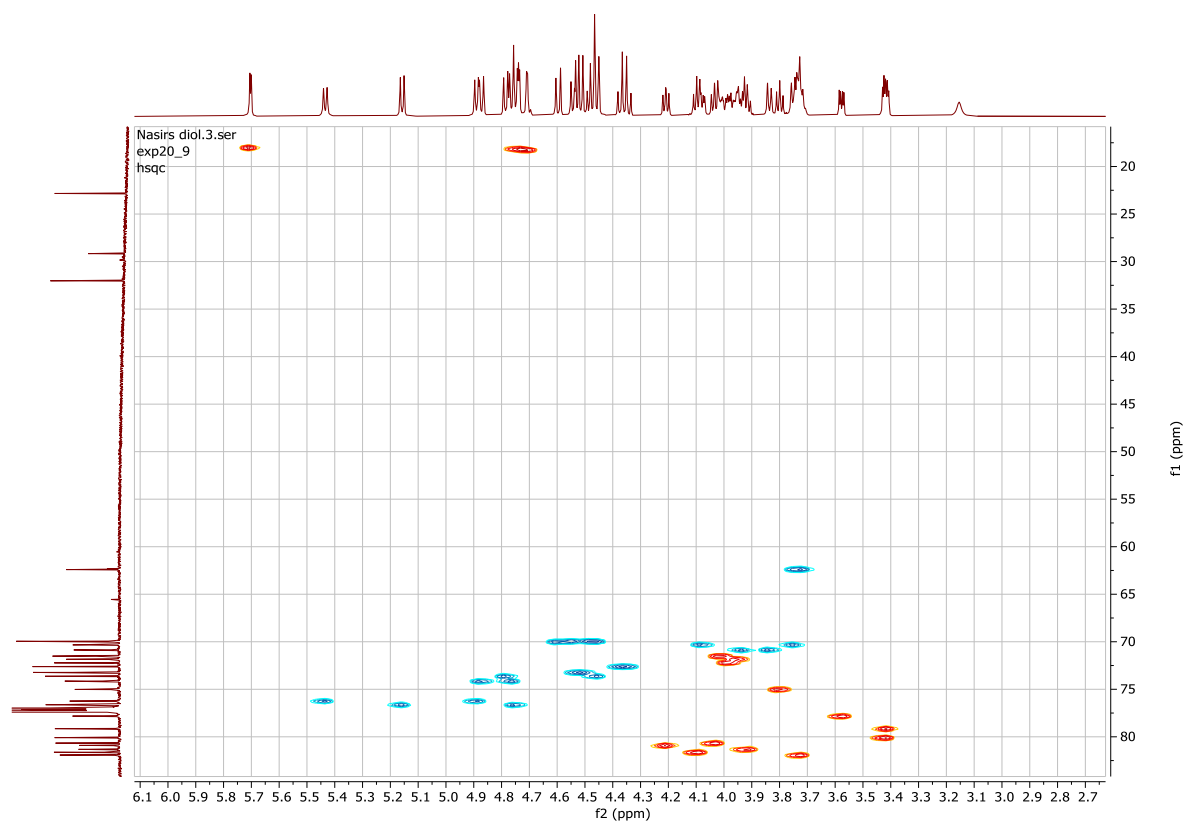

TOCSY (800 MHz, CDCl<sub>3</sub>) of **8** ( $\delta$  2.5–6.0; aromatic signals not shown)

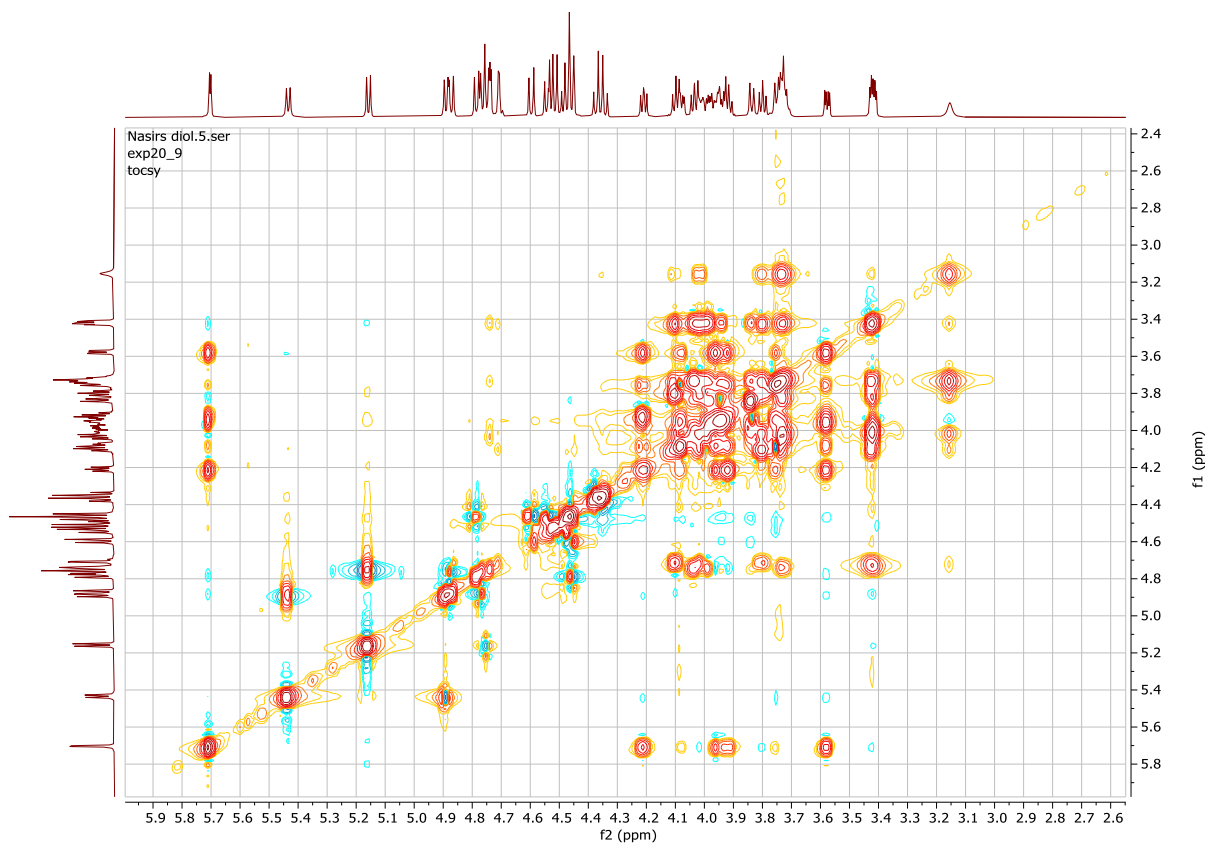

ROESY (CDCl<sub>3</sub>) of **8** (aromatic signals not shown)

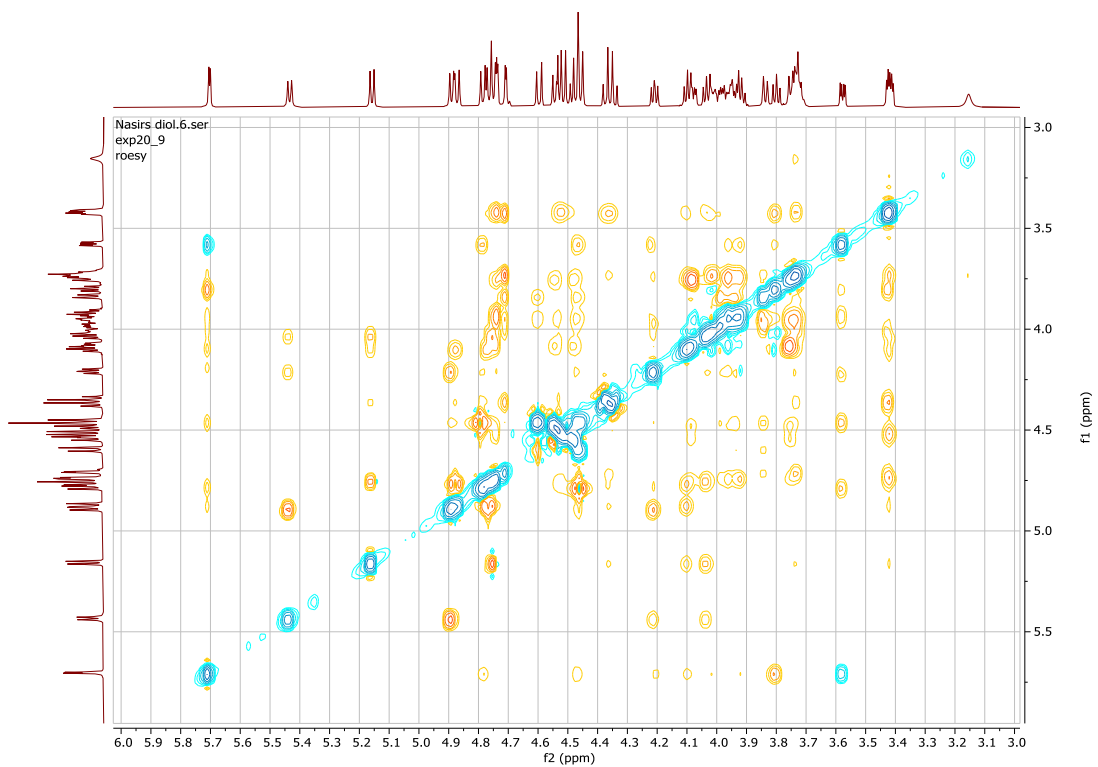

$^1\text{H}$  NMR (800 MHz,  $\text{CDCl}_3$ ) of **9**

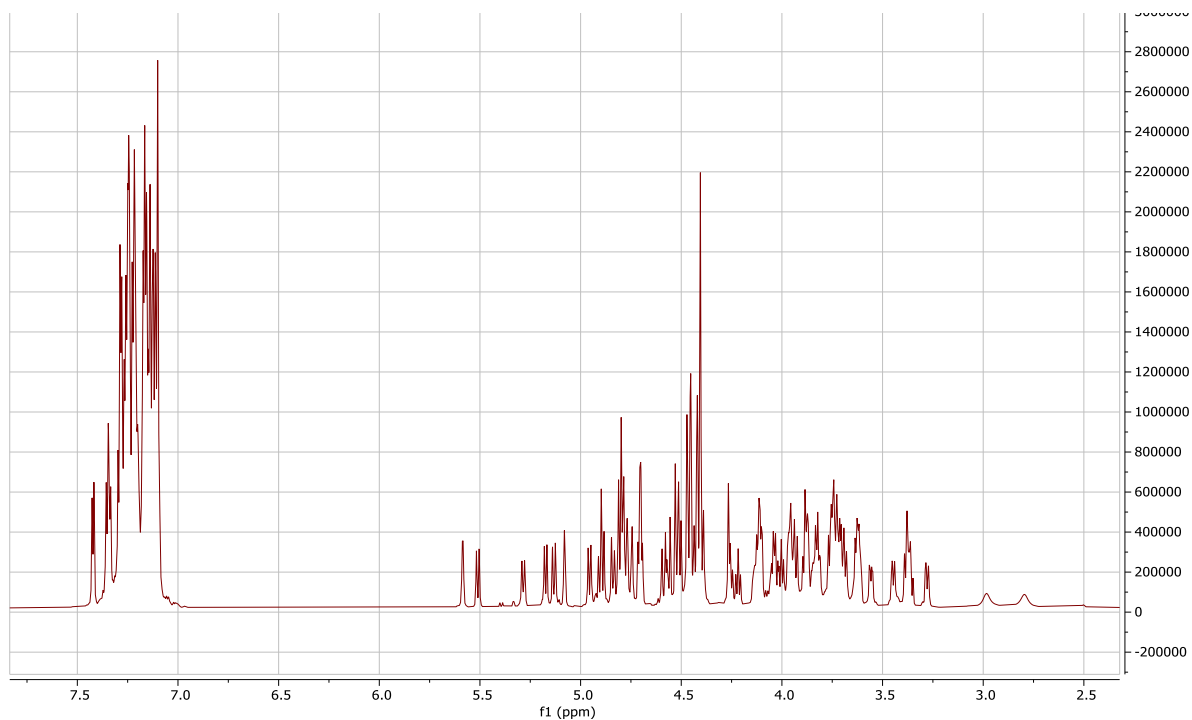

$^{13}\text{C}$  NMR (200 MHz,  $\text{CDCl}_3$ ) of **9**

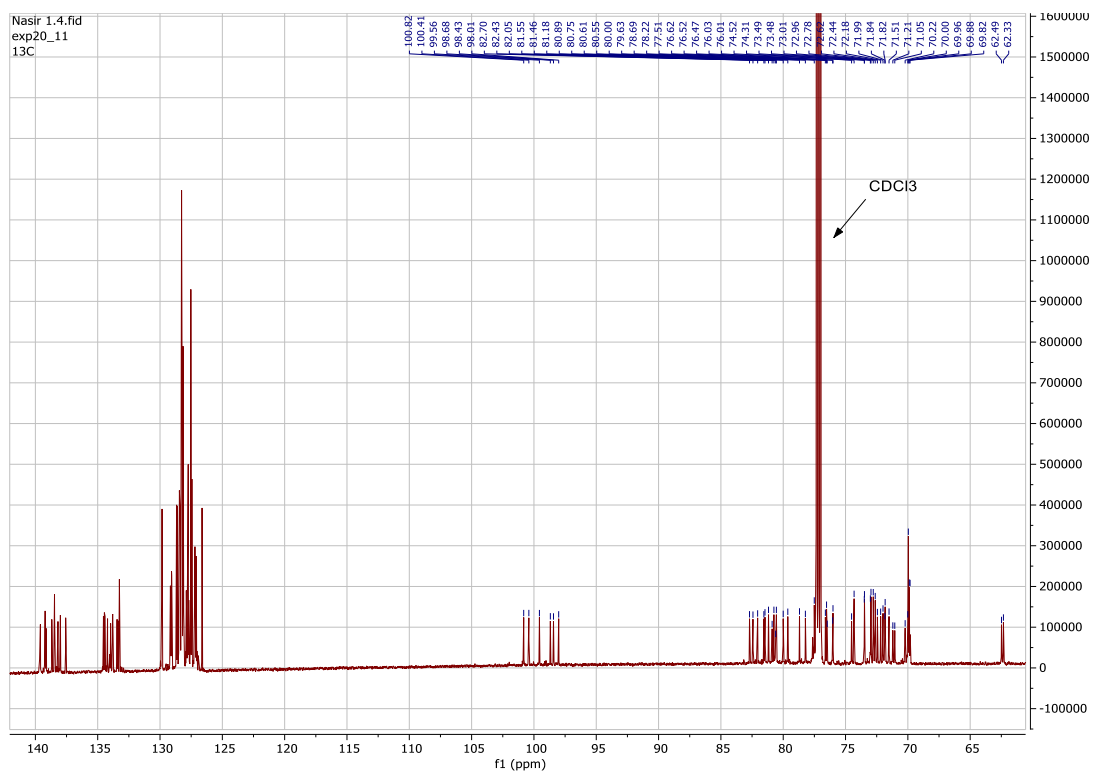

COSY (800 MHz, CDCl<sub>3</sub>) of **9** ( $\delta$  2.5–6.0; aromatic signals not shown)

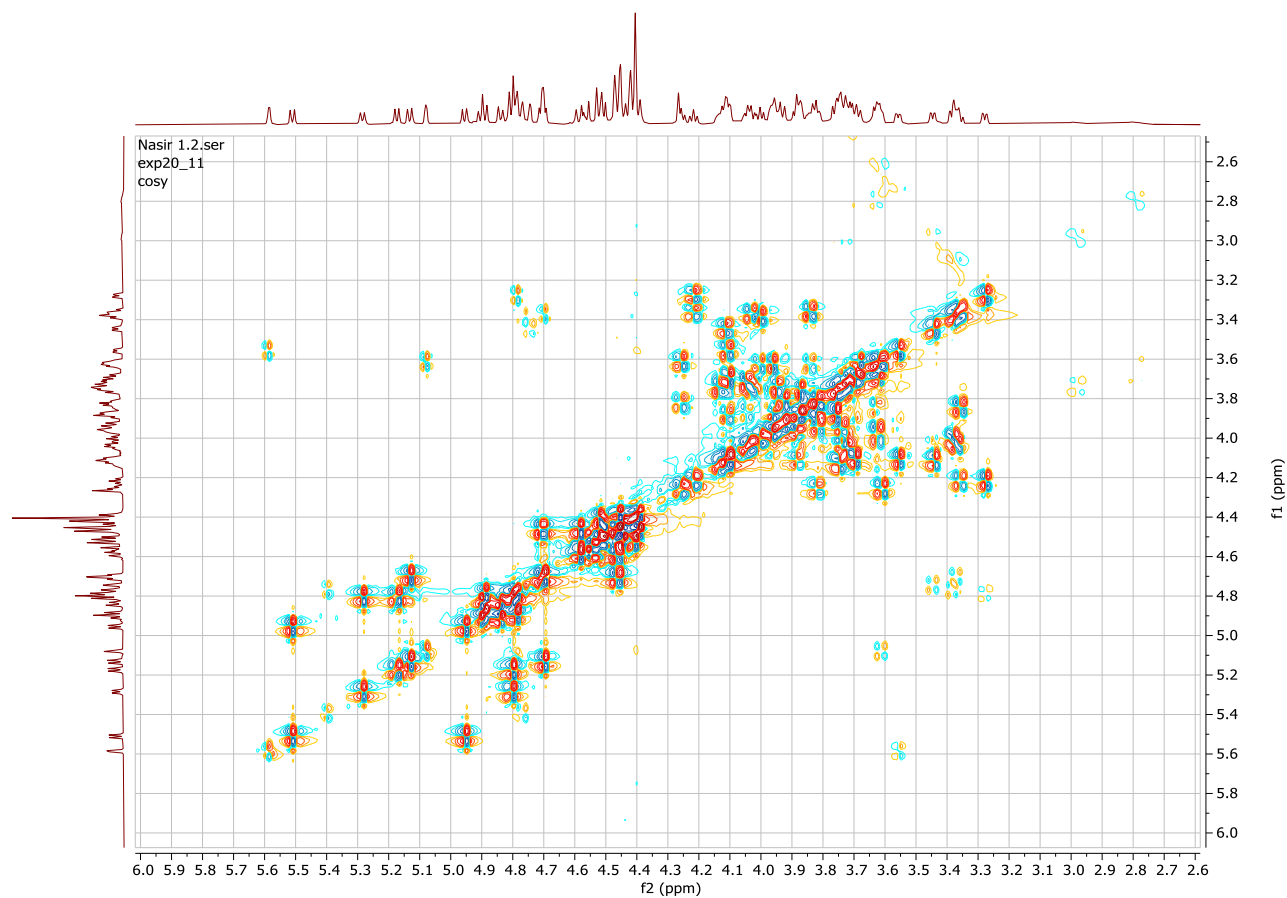

HSQC (CDCl<sub>3</sub>) of **9** (aromatic signals not shown, anomeric signal folded in, offset -80 ppm)

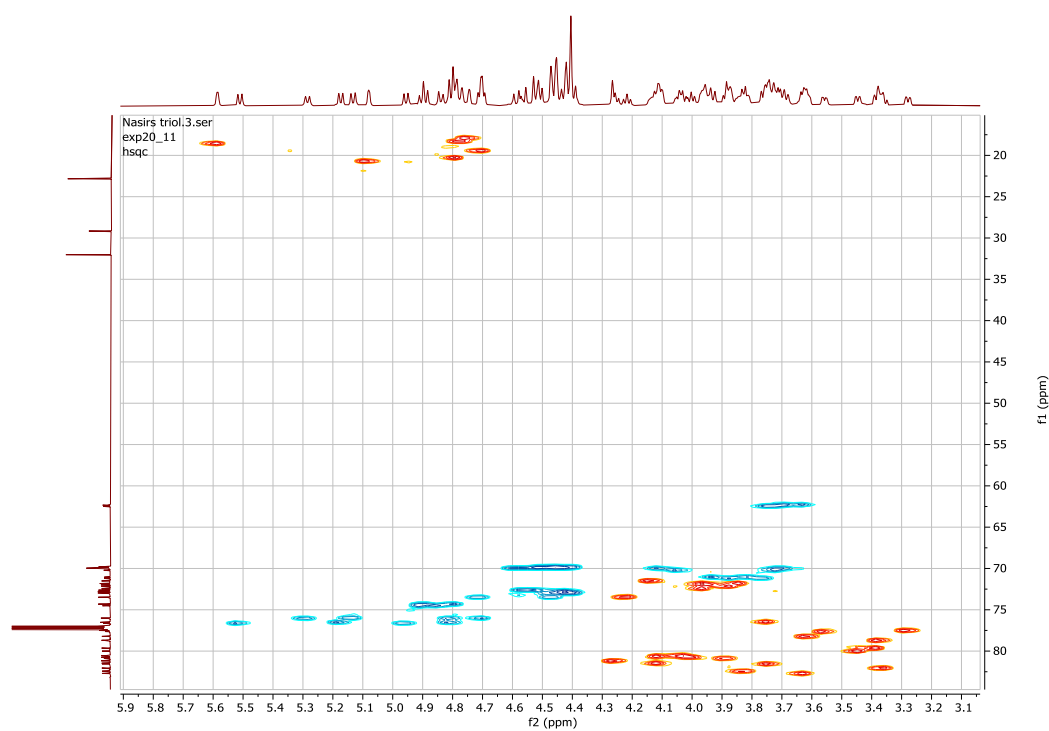



TOCSY (800 MHz, CDCl<sub>3</sub>) of **9** ( $\delta$  2.5–6.0; aromatic signals not shown)

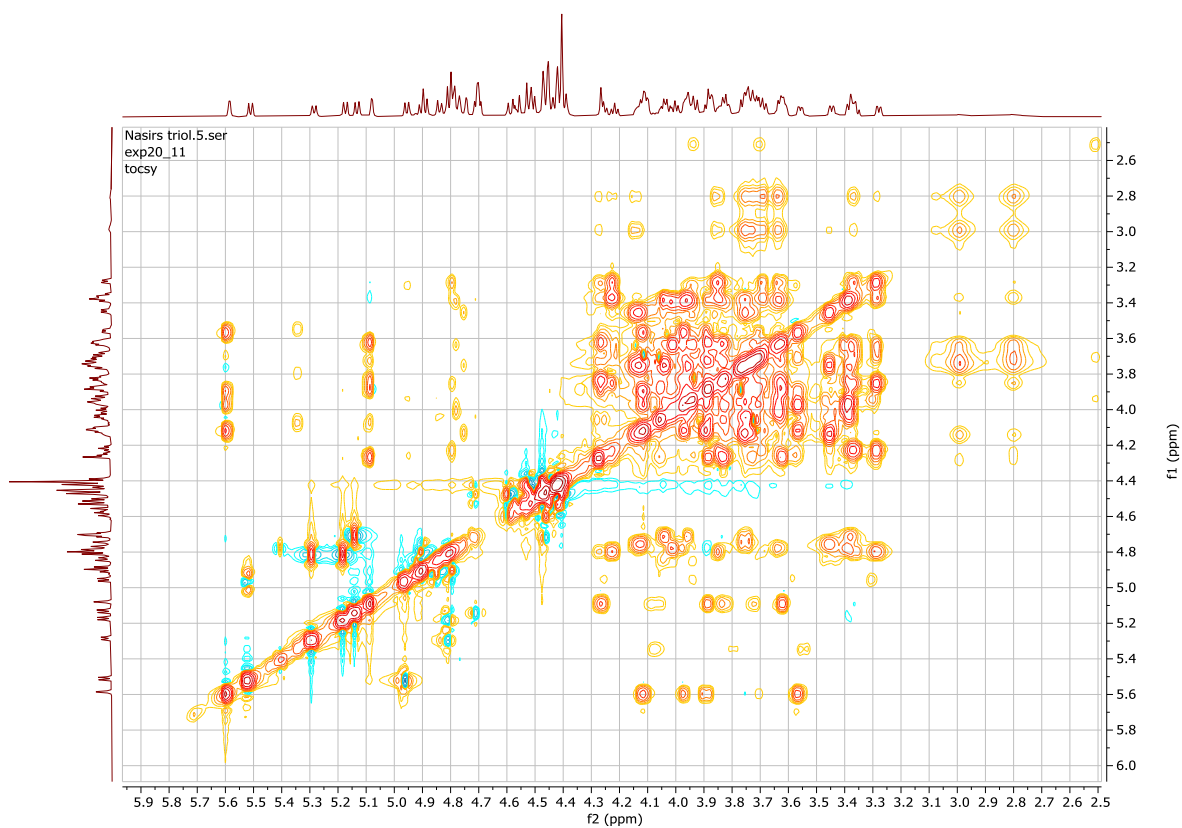

ROESY (800 MHz, CDCl<sub>3</sub>) of **9** ( $\delta$  2.5–6.0; aromatic signals not shown)

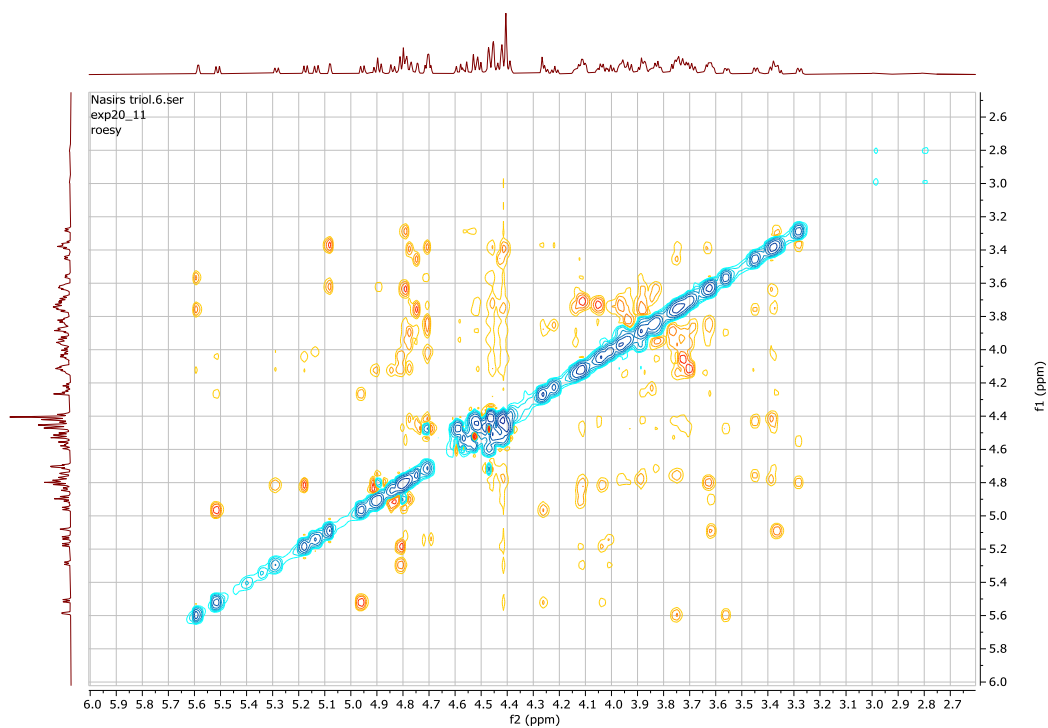

$^1\text{H}$  NMR (800 MHz,  $\text{CDCl}_3$ ) of **10** ( $\delta$  2.9–7.6)

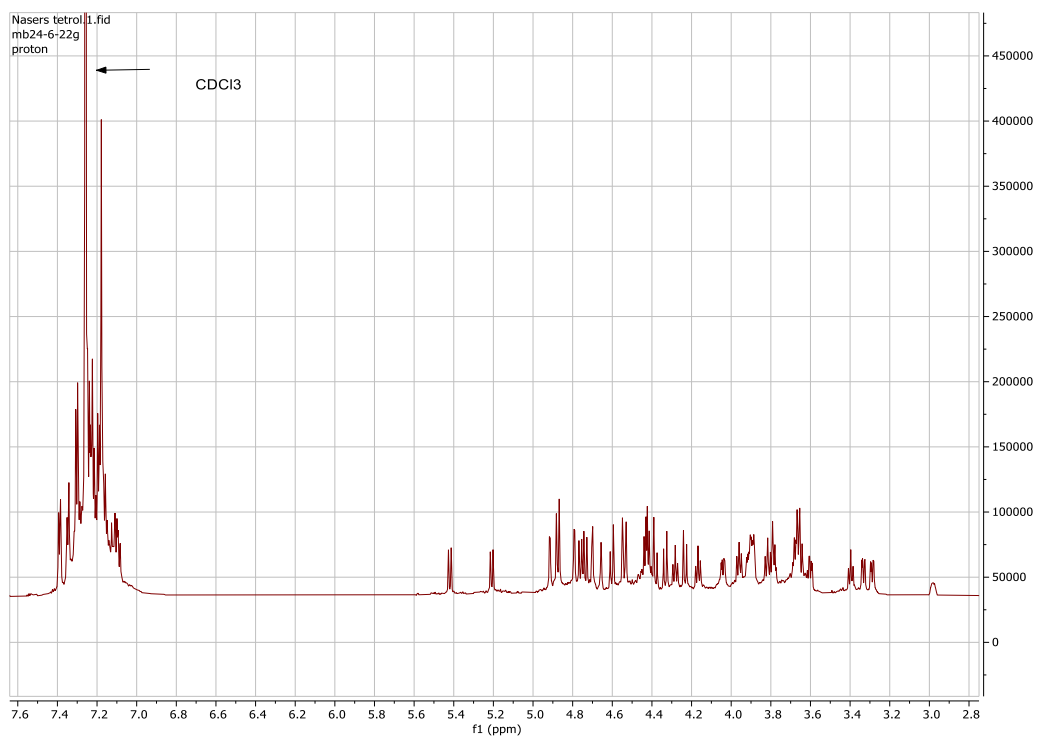

COSY (800 MHz,  $\text{CDCl}_3$ ) of **10** ( $\delta$  2.5–6; aromatic signals not shown)

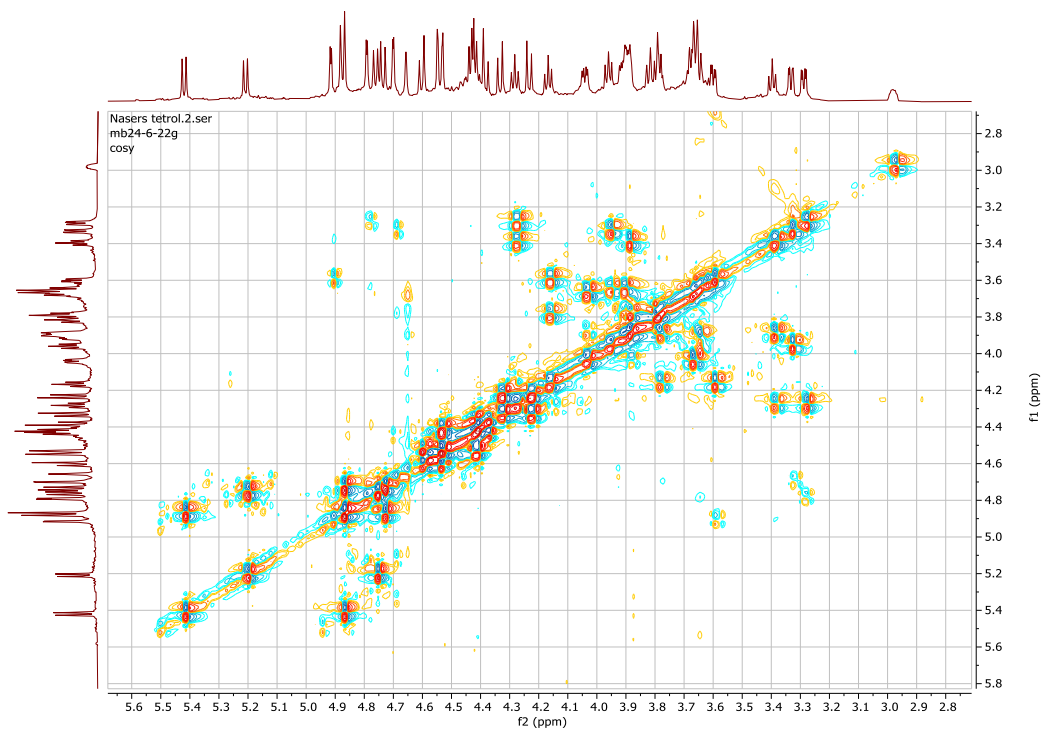

HSQC (800 MHz, CDCl<sub>3</sub>) of **10** ( $\delta$  3–5.5 vs 60–110 ppm; aromatic signals not shown)

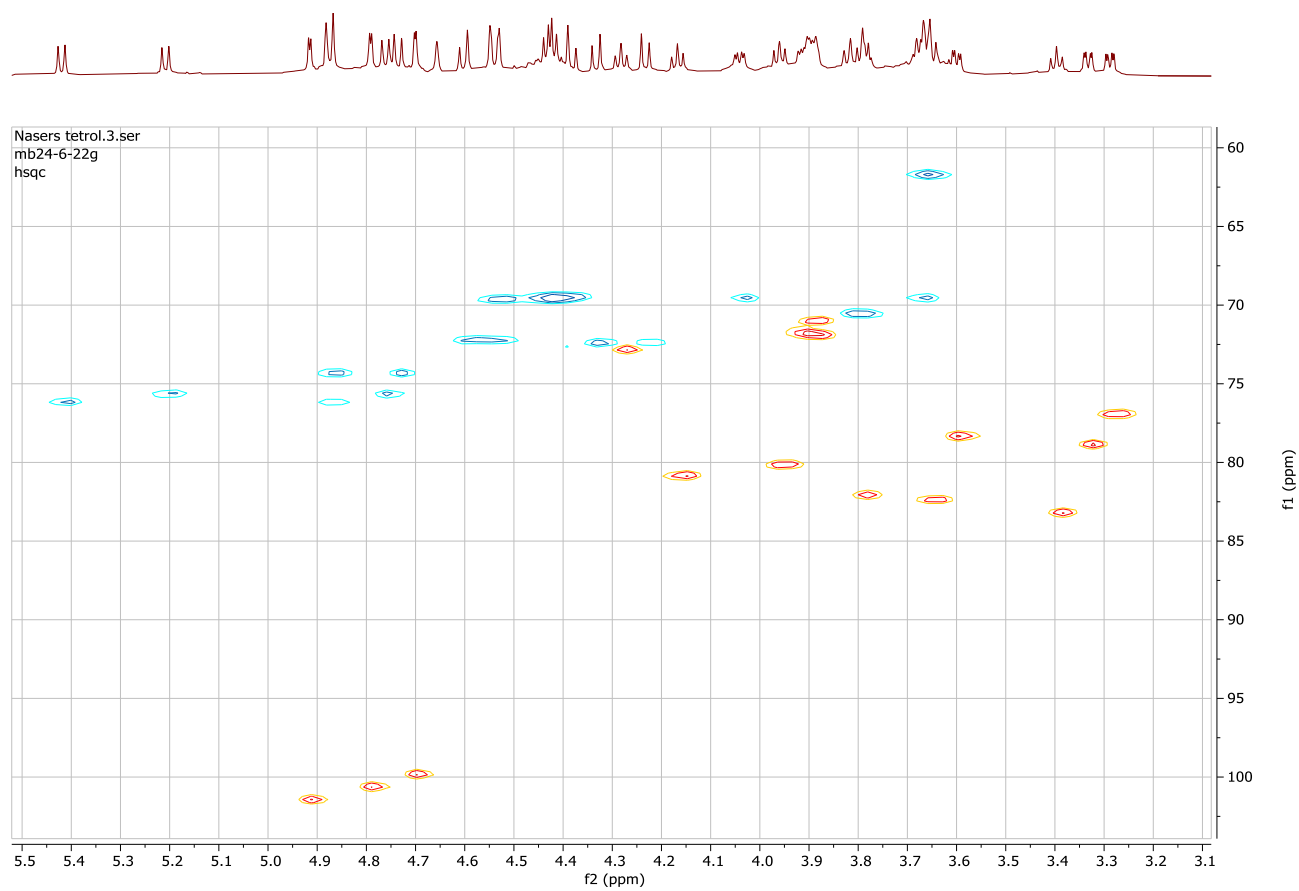

Supplement: Additional file 1 [file 1860-5397-18-165-S1.pdf]
